# Supplementary material for: Electrostatically arranged cytochrome c–fullerene photoelectrodes
Source: Royal Society of Chemistry journal article supplement (doi:10.1039/b310289k), 2003-12-19
Supplement: b310289k.doc [file b310289k.doc]

# Supporting Information

Electrostatically Arranged Cytochrome *c*-Fullerene Photoelectrodes

Israel Zilbermann,*a* Andrew Lin,*a* Maria Hatzimarinaki,*b* Andreas Hirsch,**b* and Dirk M. Guldi**a*

**Figure S1:** UV-Vis absorption spectra of a quartz substrate covered with (C60DF/ FeIIICyt*c*)8 coverage. Insert shows the solution spectra of C60DF, FeIIICyt*c* and 1:1 mixture of C60DF / FeIIICyt*c*.

**Figure S2:** Plot of absorbances at 410 nm as a function of deposited layers of (C60DF/ FeIIICyt*c*).

**Figure S3**: Ellipsometric thickness of consecutive adsorption layers of (C60DF/ FeIIICyt*c*) assembled on silicon wafer.

**Figure S4**: Linear sweep wave voltammetry performed with ITO / C60DF/ FeIIICyt*c*. ITO-working electrode versus Ag/AgCl (corrected to SCE); v= 1V/s; 0.1M NaCl supporting electrolyte; pH 6.

**Figure S5**: Photoaction spectrum of a modified ITO-electrode bearing a single (C60DF/ FeIICyt*c*) coverage under deoxygenated conditions (i.e., aqueous solution containing 0.1 M NaCl as supporting electrolyte and -0.25 V bias voltage is applied).
